# Supplementary material for: Natural variation in the regulation of neurodevelopmental genes modifies flight performance in Drosophila
Source: PLoS Genet. 2021 Mar 18;17(3):e1008887. doi: 10.1371/journal.pgen.1008887 (PMC7971549; doi:10.1371/journal.pgen.1008887)
Supplement: S4 Table — (XLSX) [file pgen.1008887.s013.xlsx]

## Sheet: S4 - Covariates
Type III ANOVA table for covariates:	Male
	Df	Sum of Sq	RSS	AIC	F value	Pr(>F)
<none>	0.60652	-1115.3
factor(wolba)	1	0.0010477	0.60757	-1117	0.3196	0.57256
factor(In_2L_t)	2	0.0090623	0.61558	-1116.4	1.3821	0.25363
factor(In_2R_NS)	2	0.0309008	0.63742	-1109.5	4.7127	0.01009	*
factor(In_3R_P)	2	0.0056735	0.61219	-1117.5	0.8653	0.42264
factor(In_3R_K)	2	0.0187241	0.62524	-1113.3	2.8556	0.06006	.
factor(In_3R_Mo)	2	0.0250186	0.63154	-1111.3	3.8156	0.02378	*
---
Signif. codes: '***' 0.001 '**' 0.01 '*' 0.05 '.' 0.1 ' ' 1
Estimated effects
	Estimate	Std. Error	t value	Pr(>|t|)
(Intercept)	0.782439	0.00713238	109.702	2.70177e-170
factor(wolba)y	0.00478445	0.00846361	0.565298	0.572556
factor(In_2L_t)1	-0.0159612	0.0142313	-1.12155	0.263506
factor(In_2L_t)2	0.0166207	0.0152043	1.09316	0.275745
factor(In_2R_NS)1	0.0652464	0.0212622	3.06866	0.00247339
factor(In_2R_NS)2	0.00709972	0.0239605	0.29631	0.767326
factor(In_3R_P)1	0.0265143	0.0239839	1.1055	0.270377
factor(In_3R_P)2	0.0219793	0.0291479	0.754062	0.451771
factor(In_3R_K)1	0.0432932	0.018799	2.30295	0.0223939
factor(In_3R_K)2	-0.0186592	0.0336436	-0.554616	0.579828
factor(In_3R_Mo)1	0.0121839	0.0197121	0.618091	0.537276
factor(In_3R_Mo)2	0.0407137	0.0149086	2.73088	0.00692753
Type III ANOVA table for covariates:	Female
	Df	Sum of Sq	RSS	AIC	F value	Pr(>F)
<none>	0.9178	-1033.7
factor(wolba)	1	0.007034	0.92483	-1034.2	1.4178	0.23528
factor(In_2L_t)	2	0.021019	0.93881	-1033.2	2.1184	0.12313
factor(In_2R_NS)	2	0.020361	0.93816	-1033.4	2.0521	0.13138
factor(In_3R_P)	2	0.016434	0.93423	-1034.2	1.6563	0.19366
factor(In_3R_K)	2	0.025538	0.94333	-1032.3	2.5738	0.07897	.
factor(In_3R_Mo)	2	0.030564	0.94836	-1031.2	3.0803	0.04831	*
---
Signif. codes: '***' 0.001 '**' 0.01 '*' 0.05 '.' 0.1 ' ' 1
Estimated effects
	Estimate	Std. Error	t value	Pr(>|t|)
(Intercept)	0.707744	0.00877375	80.6661	4.1985e-146
factor(wolba)y	0.0123971	0.0104113	1.19073	0.235283
factor(In_2L_t)1	-0.0186259	0.0175063	-1.06395	0.288738
factor(In_2L_t)2	0.0305049	0.0187032	1.631	0.104592
factor(In_2R_NS)1	0.0522349	0.0261552	1.99711	0.0472786
factor(In_2R_NS)2	0.0139076	0.0294745	0.471851	0.637589
factor(In_3R_P)1	0.0374878	0.0295033	1.27063	0.205456
factor(In_3R_P)2	0.0484039	0.0358557	1.34997	0.178676
factor(In_3R_K)1	0.052412	0.0231252	2.26644	0.0245819
factor(In_3R_K)2	0.00771773	0.0413859	0.186482	0.852271
factor(In_3R_Mo)1	0.0267448	0.0242484	1.10295	0.271482
factor(In_3R_Mo)2	0.0421683	0.0183395	2.29931	0.0226041
Type III ANOVA table for covariates:	Sex-average
	Df	Sum of Sq	RSS	AIC	F value	Pr(>F)
<none>	0.65518	-1100.1
factor(wolba)	1	0.0033778	0.65856	-1101.1	0.9538	0.33004
factor(In_2L_t)	2	0.0142875	0.66947	-1099.8	2.0171	0.13595
factor(In_2R_NS)	2	0.0252372	0.68042	-1096.6	3.563	0.03031	*
factor(In_3R_P)	2	0.010233	0.66542	-1101	1.4447	0.23846
factor(In_3R_K)	2	0.021456	0.67664	-1097.7	3.0292	0.05076	.
factor(In_3R_Mo)	2	0.0273423	0.68253	-1096	3.8602	0.02278	*
---
Signif. codes: '***' 0.001 '**' 0.01 '*' 0.05 '.' 0.1 ' ' 1
Estimated effects
	Estimate	Std. Error	t value	Pr(>|t|)
(Intercept)	0.745092	0.00741299	100.512	2.21868e-163
factor(wolba)y	0.00859079	0.00879659	0.976604	0.33004
factor(In_2L_t)1	-0.0172935	0.0147912	-1.16918	0.243837
factor(In_2L_t)2	0.0235628	0.0158025	1.49108	0.137642
factor(In_2R_NS)1	0.0587406	0.0220987	2.65811	0.0085462
factor(In_2R_NS)2	0.0105036	0.0249032	0.421779	0.673676
factor(In_3R_P)1	0.0320011	0.0249276	1.28376	0.20083
factor(In_3R_P)2	0.0351916	0.0302947	1.16164	0.246877
factor(In_3R_K)1	0.0478526	0.0195386	2.44913	0.0152517
factor(In_3R_K)2	-0.00547076	0.0349672	-0.156454	0.875846
factor(In_3R_Mo)1	0.0194643	0.0204877	0.950052	0.343325
factor(In_3R_Mo)2	0.041441	0.0154952	2.67445	0.00815565
Type III ANOVA table for covariates:	Sex-difference
	Df	Sum of Sq	RSS	AIC	F value	Pr(>F)
<none>	0.4279	-1184
factor(wolba)	1	0.0026524	0.43055	-1184.8	1.1468	0.2856
factor(In_2L_t)	2	0.0030134	0.43091	-1186.6	0.6514	0.5225
factor(In_2R_NS)	2	0.0015749	0.42947	-1187.3	0.3405	0.7119
factor(In_3R_P)	2	0.0032832	0.43118	-1186.5	0.7097	0.4931
factor(In_3R_K)	2	0.0026998	0.4306	-1186.8	0.5836	0.5589
factor(In_3R_Mo)	2	0.0017949	0.42969	-1187.2	0.388	0.679
---
Signif. codes: '***' 0.001 '**' 0.01 '*' 0.05 '.' 0.1 ' ' 1
Estimated effects
	Estimate	Std. Error	t value	Pr(>|t|)
(Intercept)	-0.0746945	0.00599075	-12.4683	2.70839e-26
factor(wolba)y	0.00761267	0.0071089	1.07087	0.285625
factor(In_2L_t)1	-0.00266469	0.0119534	-0.222923	0.823842
factor(In_2L_t)2	0.0138842	0.0127706	1.0872	0.278364
factor(In_2R_NS)1	-0.0130115	0.0178589	-0.728572	0.467185
factor(In_2R_NS)2	0.00680783	0.0201253	0.338272	0.735541
factor(In_3R_P)1	0.0109735	0.020145	0.544723	0.5866
factor(In_3R_P)2	0.0264246	0.0244824	1.07933	0.281846
factor(In_3R_K)1	0.00911874	0.01579	0.577501	0.564303
factor(In_3R_K)2	0.026377	0.0282585	0.933418	0.351821
factor(In_3R_Mo)1	0.0145609	0.0165569	0.879445	0.380301
factor(In_3R_Mo)2	0.00145461	0.0125223	0.116161	0.907651
