# Supplementary material for: Natural variation in the regulation of neurodevelopmental genes modifies flight performance in Drosophila
Source: PLoS Genet. 2021 Mar 18;17(3):e1008887. doi: 10.1371/journal.pgen.1008887 (PMC7971549; doi:10.1371/journal.pgen.1008887)
Supplement: S8 Table — (XLSX) [file pgen.1008887.s017.xlsx]

## Sheet: S8 - Twilight threshold
Sex-based phenotype	local FDR
Male	0.0369187
Female	0.0480883
Sex-average	0.0418145
Sex-difference	0.0598421
