# Supplementary material for: Natural variation in the regulation of neurodevelopmental genes modifies flight performance in Drosophila
Source: PLoS Genet. 2021 Mar 18;17(3):e1008887. doi: 10.1371/journal.pgen.1008887 (PMC7971549; doi:10.1371/journal.pgen.1008887)
Supplement: S15 Table — (XLSX) [file pgen.1008887.s024.xlsx]

## Sheet: S15 - epi x GO - CG42671
Process
GO Term	Description	P-value	FDR q-value	Enrichment	N	B	n	b	Gene
GO:0006928	movement of cell or subcellular component	7.27e-13	5.53e-09	2.58	11561	614	482	66	[sfl - sulfateless, sqd - squid, rib - ribbon, retn - retained, pgc - polar granule component, if - inflated, knrl - knirps-like, Gef64C - guanine nucleotide exchange factor gef64c, fz - frizzled, CG5048 - cg5048 gene product from transcript cg5048-ra, CG17150 - cg17150 gene product from transcript cg17150-rd, ths - thisbe, fra - frazzled, bun - bunched, jbug - jitterbug, tup - tailup, Moe - moes…
GO:0097485	neuron projection guidance	4.79e-11	1.82e-07	3.48	11561	248	482	36	[kuz - kuzbanian, brat - brain tumor, ct - cut, retn - retained, if - inflated, Gef64C - guanine nucleotide exchange factor gef64c, Src64B - src oncogene at 64b, Abl - abl tyrosine kinase, fra - frazzled, comm3 - cg42334 gene product from transcript cg42334-rc, sli - slit, tup - tailup, jbug - jitterbug, CadN - cadherin-n, Moe - moesin, Rpd3 - cg7471 gene product from transcript cg7471-ra, trio -…
GO:0050794	regulation of cellular process	1.35e-10	3.41e-07	1.46	11561	3354	482	204	[sqd - squid, pgc - polar granule component, knrl - knirps-like, RhoGAP54D - cg6477 gene product from transcript cg6477-ra, fz - frizzled, et - eye transformer, pico - cg11940 gene product from transcript cg11940-rb, Sytbeta - synaptotagmin beta, fra - frazzled, Hers - histone gene-specific epigenetic repressor in late s phase, cact - cactus, spz5 - spatzle 5, CG8830 - cg8830 gene product from tr…
GO:0007411	axon guidance	2.93e-10	5.57e-07	3.41	11561	239	482	34	[kuz - kuzbanian, brat - brain tumor, retn - retained, if - inflated, Gef64C - guanine nucleotide exchange factor gef64c, Src64B - src oncogene at 64b, Abl - abl tyrosine kinase, fra - frazzled, comm3 - cg42334 gene product from transcript cg42334-rc, sli - slit, tup - tailup, jbug - jitterbug, CadN - cadherin-n, Moe - moesin, trio - cg18214 gene product from transcript cg18214-ra, comm - commiss…
GO:0032501	multicellular organismal process	1.4e-09	2.13e-06	1.69	11561	1702	482	120	[sfl - sulfateless, sqd - squid, if - inflated, Adh - alcohol dehydrogenase, fz - frizzled, dnc - dunce, VhaSFD - vacuolar h[+]-atpase sfd subunit, neuroligin - cg13772 gene product from transcript cg13772-rb, fra - frazzled, bun - bunched, cact - cactus, kirre - kin of irre, Hk - hyperkinetic, dpr8 - cg32600 gene product from transcript cg32600-ra, sls - sallimus, nAcRalpha-30D - nicotinic acety…
GO:0050789	regulation of biological process	1.43e-09	1.81e-06	1.4	11561	3637	482	213	[sqd - squid, pgc - polar granule component, knrl - knirps-like, RhoGAP54D - cg6477 gene product from transcript cg6477-ra, fz - frizzled, et - eye transformer, pico - cg11940 gene product from transcript cg11940-rb, Sytbeta - synaptotagmin beta, fra - frazzled, Hers - histone gene-specific epigenetic repressor in late s phase, cact - cactus, spz5 - spatzle 5, CG8830 - cg8830 gene product from tr…
GO:0040011	locomotion	8.64e-09	9.38e-06	2.67	11561	369	482	41	[kuz - kuzbanian, sfl - sulfateless, sqd - squid, cp309 - cg33957 gene product from transcript cg33957-rm, pgc - polar granule component, rib - ribbon, knrl - knirps-like, if - inflated, numb - cg3779 gene product from transcript cg3779-rb, Tbh - tyramine beta hydroxylase, fz - frizzled, CG5048 - cg5048 gene product from transcript cg5048-ra, Evi5 - cg11727 gene product from transcript cg11727-ra…
GO:0065007	biological regulation	1.05e-08	9.94e-06	1.35	11561	4052	482	228	[sqd - squid, pgc - polar granule component, knrl - knirps-like, RhoGAP54D - cg6477 gene product from transcript cg6477-ra, fz - frizzled, et - eye transformer, CG1227 - cg1227 gene product from transcript cg1227-ra, Sytbeta - synaptotagmin beta, pico - cg11940 gene product from transcript cg11940-rb, fra - frazzled, Hers - histone gene-specific epigenetic repressor in late s phase, dib - disembo…
GO:0009653	anatomical structure morphogenesis	1.44e-08	1.22e-05	2	11561	841	482	70	[sfl - sulfateless, Egm - enigma, sick - sickie, bab2 - bric a brac 2, Dys - dystrophin, rib - ribbon, retn - retained, if - inflated, Gef64C - guanine nucleotide exchange factor gef64c, sdt - stardust, RhoGAP54D - cg6477 gene product from transcript cg6477-ra, fz - frizzled, dve - defective proventriculus, sog - short gastrulation, raw - cg12437 gene product from transcript cg12437-rb, Eip63E - …
GO:0048870	cell motility	1.99e-08	1.51e-05	2.96	11561	267	482	33	[kuz - kuzbanian, sfl - sulfateless, sqd - squid, cp309 - cg33957 gene product from transcript cg33957-rm, pgc - polar granule component, rib - ribbon, knrl - knirps-like, if - inflated, numb - cg3779 gene product from transcript cg3779-rb, fz - frizzled, CG5048 - cg5048 gene product from transcript cg5048-ra, Evi5 - cg11727 gene product from transcript cg11727-ra, Abl - abl tyrosine kinase, ths …
GO:0016477	cell migration	5.01e-08	3.46e-05	2.97	11561	250	482	31	[kuz - kuzbanian, sfl - sulfateless, sqd - squid, pgc - polar granule component, rib - ribbon, knrl - knirps-like, if - inflated, numb - cg3779 gene product from transcript cg3779-rb, fz - frizzled, Abl - abl tyrosine kinase, Evi5 - cg11727 gene product from transcript cg11727-ra, ths - thisbe, fra - frazzled, bun - bunched, sli - slit, tai - taiman, l(1)G0232 - lethal (1) g0232, rhea - cg6831 ge…
GO:0051239	regulation of multicellular organismal process	7.67e-08	4.86e-05	2	11561	755	482	63	[sfl - sulfateless, Syt1 - synaptotagmin 1, SPR - sex peptide receptor, fz - frizzled, sog - short gastrulation, raw - cg12437 gene product from transcript cg12437-rb, Dh31 - diuretic hormone 31, Nos - nitric oxide synthase, fra - frazzled, bun - bunched, Liprin-gamma - cg11206 gene product from transcript cg11206-ra, Sh - shaker, cact - cactus, shot - short stop, trio - cg18214 gene product from…
GO:0022604	regulation of cell morphogenesis	1.2e-07	7e-05	3.66	11561	144	482	22	[kuz - kuzbanian, rib - ribbon, Arpc2 - actin-related protein 2/3 complex, subunit 2, tutl - turtle, fz - frizzled, Abl - abl tyrosine kinase, raw - cg12437 gene product from transcript cg12437-rb, Sema-1a - cg18405 gene product from transcript cg18405-rd, fra - frazzled, Trim9 - cg31721 gene product from transcript cg31721-rb, m - miniature, sif - still life, shot - short stop, CadN - cadherin-n…
GO:0051128	regulation of cellular component organization	1.22e-07	6.64e-05	1.96	11561	782	482	64	[Syt1 - synaptotagmin 1, pgc - polar granule component, rib - ribbon, knrl - knirps-like, if - inflated, sdt - stardust, fz - frizzled, neuroligin - cg13772 gene product from transcript cg13772-rb, raw - cg12437 gene product from transcript cg12437-rb, fra - frazzled, bun - bunched, mwh - multiple wing hairs, Liprin-gamma - cg11206 gene product from transcript cg11206-ra, shot - short stop, lilli…
GO:0050793	regulation of developmental process	2.25e-07	0.000114	1.97	11561	743	482	61	[sfl - sulfateless, bab2 - bric a brac 2, Syt1 - synaptotagmin 1, rib - ribbon, fz - frizzled, sog - short gastrulation, raw - cg12437 gene product from transcript cg12437-rb, pico - cg11940 gene product from transcript cg11940-rb, Nos - nitric oxide synthase, fra - frazzled, bun - bunched, Liprin-gamma - cg11206 gene product from transcript cg11206-ra, cact - cactus, shot - short stop, Moe - moe…
GO:0048856	anatomical structure development	6.44e-07	0.000306	1.63	11561	1416	482	96	[sqd - squid, sick - sickie, Dys - dystrophin, pgc - polar granule component, retn - retained, rib - ribbon, if - inflated, sdt - stardust, Vsx2 - visual system homeobox 2 ortholog, fz - frizzled, dve - defective proventriculus, sog - short gastrulation, raw - cg12437 gene product from transcript cg12437-rb, Eip63E - ecdysone-induced protein 63e, pico - cg11940 gene product from transcript cg1194…
GO:0008037	cell recognition	7.08e-07	0.000317	4.08	11561	100	482	17	[comm - commissureless, igl - igloo, if - inflated, tutl - turtle, slow - slowdown, Abl - abl tyrosine kinase, Pvf3 - pdgf- and vegf-related factor 3, Sema-1a - cg18405 gene product from transcript cg18405-rd, lea - leak, fra - frazzled, Trim9 - cg31721 gene product from transcript cg31721-rb, nrm - neuromusculin, sli - slit, Con - connectin, shot - short stop, NetB - netrin-b, CadN - cadherin-n]
GO:0022603	regulation of anatomical structure morphogenesis	1.81e-06	0.000765	2.69	11561	250	482	28	[kuz - kuzbanian, rib - ribbon, Src64B - src oncogene at 64b, fz - frizzled, sog - short gastrulation, Abl - abl tyrosine kinase, raw - cg12437 gene product from transcript cg12437-rb, fra - frazzled, shot - short stop, sif - still life, CadN - cadherin-n, Moe - moesin, trio - cg18214 gene product from transcript cg18214-ra, Rpd3 - cg7471 gene product from transcript cg7471-ra, CG34383 - cg34383 …
GO:0008038	neuron recognition	1.97e-06	0.00079	4	11561	96	482	16	[comm - commissureless, if - inflated, tutl - turtle, slow - slowdown, Abl - abl tyrosine kinase, Pvf3 - pdgf- and vegf-related factor 3, Sema-1a - cg18405 gene product from transcript cg18405-rd, fra - frazzled, lea - leak, Trim9 - cg31721 gene product from transcript cg31721-rb, nrm - neuromusculin, sli - slit, Con - connectin, shot - short stop, NetB - netrin-b, CadN - cadherin-n]
GO:0016199	axon midline choice point recognition	3.51e-06	0.00133	8	11561	24	482	8	[comm - commissureless, fra - frazzled, Sema-1a - cg18405 gene product from transcript cg18405-rd, Trim9 - cg31721 gene product from transcript cg31721-rb, sli - slit, tutl - turtle, shot - short stop, Abl - abl tyrosine kinase]
GO:0030029	actin filament-based process	4.13e-06	0.0015	2.9	11561	190	482	23	[Traf4 - tnf-receptor-associated factor 4, if - inflated, G-oalpha47A - g protein oalpha 47a, CG34417 - cg34417 gene product from transcript cg34417-ri, Arpc2 - actin-related protein 2/3 complex, subunit 2, sls - sallimus, Src64B - src oncogene at 64b, Zasp66 - z band alternatively spliced pdz-motif protein 66, Dg - dystroglycan, hts - hu li tai shao, capu - cappuccino, m - miniature, twi - twist…
GO:0032502	developmental process	5.3e-06	0.00183	1.44	11561	2138	482	128	[sfl - sulfateless, sqd - squid, sick - sickie, pgc - polar granule component, rib - ribbon, if - inflated, sdt - stardust, RhoGAP54D - cg6477 gene product from transcript cg6477-ra, fz - frizzled, dnc - dunce, neuroligin - cg13772 gene product from transcript cg13772-rb, raw - cg12437 gene product from transcript cg12437-rb, pico - cg11940 gene product from transcript cg11940-rb, fra - frazzled,…
GO:0009886	post-embryonic animal morphogenesis	5.69e-06	0.00188	2.32	11561	341	482	33	[sfl - sulfateless, bab2 - bric a brac 2, ct - cut, Dys - dystrophin, if - inflated, bi - bifid, Gef64C - guanine nucleotide exchange factor gef64c, RhoGAP54D - cg6477 gene product from transcript cg6477-ra, drm - drumstick, dve - defective proventriculus, fz - frizzled, sog - short gastrulation, Uvrag - uv-resistance associated gene, mwh - multiple wing hairs, shot - short stop, trio - cg18214 g…
GO:0007389	pattern specification process	6.18e-06	0.00196	2.16	11561	422	482	38	[sfl - sulfateless, H15 - cg6604 gene product from transcript cg6604-ra, sqd - squid, brat - brain tumor, Dys - dystrophin, retn - retained, bi - bifid, nab - cg33545 gene product from transcript cg33545-rc, fz - frizzled, drm - drumstick, sog - short gastrulation, wbl - windbeutel, fra - frazzled, sli - slit, cact - cactus, lilli - lilliputian, CadN - cadherin-n, Moe - moesin, Rpd3 - cg7471 gene…
GO:0001667	ameboidal-type cell migration	6.66e-06	0.00203	3.09	11561	155	482	20	[kuz - kuzbanian, sfl - sulfateless, sqd - squid, rib - ribbon, mim - missing-in-metastasis, knrl - knirps-like, if - inflated, fz - frizzled, Evi5 - cg11727 gene product from transcript cg11727-ra, ths - thisbe, Sema-1a - cg18405 gene product from transcript cg18405-rd, dally - division abnormally delayed, bun - bunched, sli - slit, Lar - leukocyte-antigen-related-like, tai - taiman, Sdc - synde…
GO:0016198	axon choice point recognition	6.93e-06	0.00202	7.38	11561	26	482	8	[comm - commissureless, Sema-1a - cg18405 gene product from transcript cg18405-rd, fra - frazzled, Trim9 - cg31721 gene product from transcript cg31721-rb, sli - slit, tutl - turtle, shot - short stop, Abl - abl tyrosine kinase]
GO:0050770	regulation of axonogenesis	7.76e-06	0.00218	4.64	11561	62	482	12	[kuz - kuzbanian, Sema-1a - cg18405 gene product from transcript cg18405-rd, fra - frazzled, Trim9 - cg31721 gene product from transcript cg31721-rb, sif - still life, shot - short stop, Lar - leukocyte-antigen-related-like, CadN - cadherin-n, NetB - netrin-b, fz - frizzled, Rpd3 - cg7471 gene product from transcript cg7471-ra, trio - cg18214 gene product from transcript cg18214-ra]
GO:2000026	regulation of multicellular organismal development	9.12e-06	0.00248	1.94	11561	581	482	47	[kuz - kuzbanian, sfl - sulfateless, brat - brain tumor, Syt1 - synaptotagmin 1, desat1 - cg5887 gene product from transcript cg5887-ra, numb - cg3779 gene product from transcript cg3779-rb, Bap60 - brahma associated protein 60kd, Src64B - src oncogene at 64b, fz - frizzled, Abl - abl tyrosine kinase, sog - short gastrulation, raw - cg12437 gene product from transcript cg12437-rb, hiw - highwire,…
GO:0048859	formation of anatomical boundary	9.49e-06	0.00249	7.11	11561	27	482	8	[lea - leak, dally - division abnormally delayed, fra - frazzled, ct - cut, mirr - mirror, sli - slit, NetB - netrin-b, Scr - sex combs reduced]
GO:0008045	motor neuron axon guidance	9.97e-06	0.00252	4.21	11561	74	482	13	[spz5 - spatzle 5, mp - multiplexin, Abl - abl tyrosine kinase, fra - frazzled, dally - division abnormally delayed, Sema-1a - cg18405 gene product from transcript cg18405-rd, beat-Va - cg10134 gene product from transcript cg10134-rc, beat-Vc - cg14390 gene product from transcript cg14390-ra, tup - tailup, for - foraging, NetB - netrin-b, Lar - leukocyte-antigen-related-like, Sdc - syndecan]
GO:0007165	signal transduction	1.23e-05	0.00302	1.74	11561	839	482	61	[sfl - sulfateless, SPR - sex peptide receptor, Cng - cyclic-nucleotide-gated ion channel protein, Gyc88E - guanylyl cyclase at 88e, RhoGAP54D - cg6477 gene product from transcript cg6477-ra, mtt - mangetout, fz - frizzled, et - eye transformer, dnc - dunce, Dh31 - diuretic hormone 31, pico - cg11940 gene product from transcript cg11940-rb, ths - thisbe, Nos - nitric oxide synthase, rdgA - retina…
GO:0010631	epithelial cell migration	1.65e-05	0.00392	3.13	11561	138	482	18	[kuz - kuzbanian, sfl - sulfateless, sqd - squid, rib - ribbon, mim - missing-in-metastasis, if - inflated, knrl - knirps-like, fz - frizzled, Evi5 - cg11727 gene product from transcript cg11727-ra, dally - division abnormally delayed, bun - bunched, sli - slit, Lar - leukocyte-antigen-related-like, tai - taiman, Sdc - syndecan, l(1)G0232 - lethal (1) g0232, dpp - decapentaplegic, rhea - cg6831 g…
GO:0010975	regulation of neuron projection development	2.15e-05	0.00496	3.34	11561	115	482	16	[kuz - kuzbanian, comm - commissureless, tutl - turtle, fz - frizzled, Abl - abl tyrosine kinase, sgg - shaggy, Sema-1a - cg18405 gene product from transcript cg18405-rd, fra - frazzled, Trim9 - cg31721 gene product from transcript cg31721-rb, sif - still life, shot - short stop, NetB - netrin-b, Lar - leukocyte-antigen-related-like, CadN - cadherin-n, trio - cg18214 gene product from transcript …
GO:0040008	regulation of growth	2.22e-05	0.00497	2.36	11561	285	482	28	[kuz - kuzbanian, sfl - sulfateless, brat - brain tumor, desat1 - cg5887 gene product from transcript cg5887-ra, Src64B - src oncogene at 64b, fz - frizzled, Abl - abl tyrosine kinase, wbl - windbeutel, pico - cg11940 gene product from transcript cg11940-rb, hiw - highwire, Nos - nitric oxide synthase, bun - bunched, Liprin-gamma - cg11206 gene product from transcript cg11206-ra, shot - short sto…
GO:0090066	regulation of anatomical structure size	2.26e-05	0.0049	2.56	11561	225	482	24	[rib - ribbon, desat1 - cg5887 gene product from transcript cg5887-ra, Arpc2 - actin-related protein 2/3 complex, subunit 2, Src64B - src oncogene at 64b, slow - slowdown, Pvf2 - pdgf- and vegf-related factor 2, fz - frizzled, sals - sarcomere length short, Abl - abl tyrosine kinase, Pvf3 - pdgf- and vegf-related factor 3, raw - cg12437 gene product from transcript cg12437-rb, pico - cg11940 gene…
GO:0040012	regulation of locomotion	2.51e-05	0.0053	3.46	11561	104	482	15	[kuz - kuzbanian, Tbh - tyramine beta hydroxylase, fz - frizzled, Pvf2 - pdgf- and vegf-related factor 2, Evi5 - cg11727 gene product from transcript cg11727-ra, Pvf3 - pdgf- and vegf-related factor 3, lea - leak, Sema-1a - cg18405 gene product from transcript cg18405-rd, fra - frazzled, Trim9 - cg31721 gene product from transcript cg31721-rb, sli - slit, NetB - netrin-b, Lar - leukocyte-antigen-…
GO:0065008	regulation of biological quality	2.71e-05	0.00557	1.59	11561	1128	482	75	[Egm - enigma, Syt1 - synaptotagmin 1, Dys - dystrophin, SPR - sex peptide receptor, rib - ribbon, retn - retained, if - inflated, Frq1 - frequenin 1, SK - small conductance calcium-activated potassium channel, fz - frizzled, CG1688 - cg1688 gene product from transcript cg1688-ra, raw - cg12437 gene product from transcript cg12437-rb, Dh31 - diuretic hormone 31, CG1227 - cg1227 gene product from …
GO:0048869	cellular developmental process	3.05e-05	0.00611	1.64	11561	997	482	68	[sqd - squid, sick - sickie, pgc - polar granule component, retn - retained, if - inflated, sdt - stardust, fz - frizzled, raw - cg12437 gene product from transcript cg12437-rb, ths - thisbe, fra - frazzled, bun - bunched, tup - tailup, shot - short stop, cact - cactus, lilli - lilliputian, Moe - moesin, Rpd3 - cg7471 gene product from transcript cg7471-ra, kirre - kin of irre, Arpc2 - actin-rela…
GO:0048638	regulation of developmental growth	3.43e-05	0.00668	2.55	11561	216	482	23	[kuz - kuzbanian, sfl - sulfateless, brat - brain tumor, desat1 - cg5887 gene product from transcript cg5887-ra, G-oalpha47A - g protein oalpha 47a, Src64B - src oncogene at 64b, fz - frizzled, Abl - abl tyrosine kinase, sgg - shaggy, wbl - windbeutel, pico - cg11940 gene product from transcript cg11940-rb, hiw - highwire, Nos - nitric oxide synthase, dally - division abnormally delayed, Sema-1a …
GO:0032879	regulation of localization	3.57e-05	0.00678	1.98	11561	473	482	39	[kuz - kuzbanian, brat - brain tumor, Syt1 - synaptotagmin 1, Dys - dystrophin, numb - cg3779 gene product from transcript cg3779-rb, sdt - stardust, CG9915 - cg9915 gene product from transcript cg9915-rc, Ca-beta - ca2+-channel-protein-beta-subunit, Frq1 - frequenin 1, fz - frizzled, Evi5 - cg11727 gene product from transcript cg11727-ra, Abl - abl tyrosine kinase, Flo-2 - flotillin-2, eag - eth…
GO:0098609	cell-cell adhesion	3.65e-05	0.00676	3.53	11561	95	482	14	[if - inflated, tutl - turtle, Src64B - src oncogene at 64b, fz - frizzled, neuroligin - cg13772 gene product from transcript cg13772-rb, beat-Va - cg10134 gene product from transcript cg10134-rc, CG34127 - cg34127 gene product from transcript cg34127-rc, beat-Vc - cg14390 gene product from transcript cg14390-ra, Con - connectin, CadN - cadherin-n, ed - echinoid, kirre - kin of irre, rhea - cg683…
GO:0007155	cell adhesion	3.7e-05	0.0067	2.85	11561	160	482	19	[if - inflated, G-oalpha47A - g protein oalpha 47a, mp - multiplexin, tutl - turtle, Src64B - src oncogene at 64b, fz - frizzled, Flo-2 - flotillin-2, neuroligin - cg13772 gene product from transcript cg13772-rb, m - miniature, beat-Va - cg10134 gene product from transcript cg10134-rc, Gbeta13F - g protein beta-subunit 13f, CG34127 - cg34127 gene product from transcript cg34127-rc, beat-Vc - cg14…
GO:0007610	behavior	4.07e-05	0.00719	1.95	11561	493	482	40	[Syt1 - synaptotagmin 1, retn - retained, SPR - sex peptide receptor, CG10440 - cg10440 gene product from transcript cg10440-rb, desat1 - cg5887 gene product from transcript cg5887-ra, Adh - alcohol dehydrogenase, numb - cg3779 gene product from transcript cg3779-rb, Tbh - tyramine beta hydroxylase, nab - cg33545 gene product from transcript cg33545-rc, Src64B - src oncogene at 64b, mtt - mangeto…
GO:0010160	formation of animal organ boundary	4.25e-05	0.00735	8.47	11561	17	482	6	[fra - frazzled, lea - leak, dally - division abnormally delayed, sli - slit, NetB - netrin-b, Scr - sex combs reduced]
GO:0007432	salivary gland boundary specification	4.63e-05	0.00781	10.9	11561	11	482	5	[fra - frazzled, lea - leak, sli - slit, NetB - netrin-b, Scr - sex combs reduced]
GO:0120035	regulation of plasma membrane bounded cell projection organization	4.7e-05	0.00776	2.9	11561	149	482	18	[kuz - kuzbanian, comm - commissureless, tutl - turtle, fz - frizzled, Abl - abl tyrosine kinase, sgg - shaggy, Sema-1a - cg18405 gene product from transcript cg18405-rd, fra - frazzled, Trim9 - cg31721 gene product from transcript cg31721-rb, sif - still life, shot - short stop, CadN - cadherin-n, NetB - netrin-b, Lar - leukocyte-antigen-related-like, PsGEF - protostome-specific gef, trio - cg18…
GO:0030036	actin cytoskeleton organization	4.8e-05	0.00776	2.8	11561	163	482	19	[if - inflated, G-oalpha47A - g protein oalpha 47a, CG34417 - cg34417 gene product from transcript cg34417-ri, Arpc2 - actin-related protein 2/3 complex, subunit 2, sls - sallimus, Src64B - src oncogene at 64b, Zasp66 - z band alternatively spliced pdz-motif protein 66, Dg - dystroglycan, hts - hu li tai shao, twi - twist, CG32264 - cg32264 gene product from transcript cg32264-rk, CG32982 - cg329…
GO:0031344	regulation of cell projection organization	5.14e-05	0.00814	2.88	11561	150	482	18	[kuz - kuzbanian, comm - commissureless, tutl - turtle, fz - frizzled, Abl - abl tyrosine kinase, sgg - shaggy, Sema-1a - cg18405 gene product from transcript cg18405-rd, fra - frazzled, Trim9 - cg31721 gene product from transcript cg31721-rb, sif - still life, shot - short stop, CadN - cadherin-n, NetB - netrin-b, Lar - leukocyte-antigen-related-like, PsGEF - protostome-specific gef, trio - cg18…
GO:0032956	regulation of actin cytoskeleton organization	5.82e-05	0.00903	3.39	11561	99	482	14	[if - inflated, Arpc2 - actin-related protein 2/3 complex, subunit 2, Src64B - src oncogene at 64b, fz - frizzled, sals - sarcomere length short, Abl - abl tyrosine kinase, hts - hu li tai shao, Gbeta13F - g protein beta-subunit 13f, capu - cappuccino, mwh - multiple wing hairs, Moe - moesin, ed - echinoid, PsGEF - protostome-specific gef, dia - diaphanous]
GO:0048675	axon extension	6e-05	0.00912	5.64	11561	34	482	8	[Sh - shaker, Lar - leukocyte-antigen-related-like, CadN - cadherin-n, tai - taiman, fz - frizzled, dnc - dunce, trio - cg18214 gene product from transcript cg18214-ra, CadN2 - cadherin-n2]
GO:0048513	animal organ development	6.25e-05	0.00932	1.84	11561	573	482	44	[kuz - kuzbanian, H15 - cg6604 gene product from transcript cg6604-ra, brat - brain tumor, Dys - dystrophin, ct - cut, retn - retained, rib - ribbon, if - inflated, numb - cg3779 gene product from transcript cg3779-rb, fz - frizzled, Abl - abl tyrosine kinase, sog - short gastrulation, B4 - cg9239 gene product from transcript cg9239-rc, raw - cg12437 gene product from transcript cg12437-rb, pico …
GO:0042391	regulation of membrane potential	6.56e-05	0.00958	3.79	11561	76	482	12	[eag - ether a go-go, fh - frataxin homolog, Sh - shaker, nAcRalpha-7E - nicotinic acetylcholine receptor alpha 7e, SK - small conductance calcium-activated potassium channel, Moe - moesin, nAcRalpha-30D - nicotinic acetylcholine receptor alpha 30d, nAcRalpha-34E - nicotinic acetylcholine receptor alpha 34e, shakB - shaking b, CG1688 - cg1688 gene product from transcript cg1688-ra, CG34396 - cg34…
GO:0022610	biological adhesion	7.26e-05	0.0104	2.71	11561	168	482	19	[if - inflated, G-oalpha47A - g protein oalpha 47a, mp - multiplexin, tutl - turtle, Src64B - src oncogene at 64b, fz - frizzled, Flo-2 - flotillin-2, neuroligin - cg13772 gene product from transcript cg13772-rb, m - miniature, beat-Va - cg10134 gene product from transcript cg10134-rc, Gbeta13F - g protein beta-subunit 13f, CG34127 - cg34127 gene product from transcript cg34127-rc, beat-Vc - cg14…
GO:0032970	regulation of actin filament-based process	7.28e-05	0.0102	3.32	11561	101	482	14	[if - inflated, Arpc2 - actin-related protein 2/3 complex, subunit 2, Src64B - src oncogene at 64b, fz - frizzled, sals - sarcomere length short, Abl - abl tyrosine kinase, hts - hu li tai shao, Gbeta13F - g protein beta-subunit 13f, capu - cappuccino, mwh - multiple wing hairs, Moe - moesin, ed - echinoid, PsGEF - protostome-specific gef, dia - diaphanous]
GO:0016043	cellular component organization	7.96e-05	0.011	1.37	11561	2195	482	125	[sqd - squid, sick - sickie, rib - ribbon, if - inflated, sdt - stardust, fz - frizzled, feo - fascetto, raw - cg12437 gene product from transcript cg12437-rb, neuroligin - cg13772 gene product from transcript cg13772-rb, CG1227 - cg1227 gene product from transcript cg1227-ra, pico - cg11940 gene product from transcript cg11940-rb, fra - frazzled, Hers - histone gene-specific epigenetic repressor…
GO:0003002	regionalization	8.89e-05	0.0121	2.22	11561	292	482	27	[sfl - sulfateless, H15 - cg6604 gene product from transcript cg6604-ra, sqd - squid, brat - brain tumor, retn - retained, Dys - dystrophin, bi - bifid, nab - cg33545 gene product from transcript cg33545-rc, fz - frizzled, fra - frazzled, sli - slit, cact - cactus, lilli - lilliputian, Moe - moesin, Rpd3 - cg7471 gene product from transcript cg7471-ra, A2bp1 - ataxin-2 binding protein 1, Scr - se…
GO:1990138	neuron projection extension	9.29e-05	0.0124	5.33	11561	36	482	8	[Sh - shaker, Lar - leukocyte-antigen-related-like, CadN - cadherin-n, tai - taiman, fz - frizzled, dnc - dunce, trio - cg18214 gene product from transcript cg18214-ra, CadN2 - cadherin-n2]
GO:0010769	regulation of cell morphogenesis involved in differentiation	9.57e-05	0.0125	3.43	11561	91	482	13	[kuz - kuzbanian, tutl - turtle, fz - frizzled, fra - frazzled, Sema-1a - cg18405 gene product from transcript cg18405-rd, Trim9 - cg31721 gene product from transcript cg31721-rb, shot - short stop, sif - still life, NetB - netrin-b, CadN - cadherin-n, Lar - leukocyte-antigen-related-like, Rpd3 - cg7471 gene product from transcript cg7471-ra, trio - cg18214 gene product from transcript cg18214-ra]
GO:0071840	cellular component organization or biogenesis	9.71e-05	0.0125	1.36	11561	2226	482	126	[sqd - squid, sick - sickie, rib - ribbon, if - inflated, sdt - stardust, fz - frizzled, feo - fascetto, raw - cg12437 gene product from transcript cg12437-rb, neuroligin - cg13772 gene product from transcript cg13772-rb, CG1227 - cg1227 gene product from transcript cg1227-ra, pico - cg11940 gene product from transcript cg11940-rb, fra - frazzled, Hers - histone gene-specific epigenetic repressor…
GO:0110053	regulation of actin filament organization	0.000105	0.0133	3.88	11561	68	482	11	[hts - hu li tai shao, capu - cappuccino, mwh - multiple wing hairs, if - inflated, Arpc2 - actin-related protein 2/3 complex, subunit 2, Src64B - src oncogene at 64b, fz - frizzled, sals - sarcomere length short, PsGEF - protostome-specific gef, Abl - abl tyrosine kinase, dia - diaphanous]
GO:0019932	second-messenger-mediated signaling	0.000107	0.0134	3.39	11561	92	482	13	[CG34411 - cg34411 gene product from transcript cg34411-rb, Cng - cyclic-nucleotide-gated ion channel protein, G-oalpha47A - g protein oalpha 47a, Ca-beta - ca2+-channel-protein-beta-subunit, Gyc88E - guanylyl cyclase at 88e, Pde9 - phosphodiesterase 9, dnc - dunce, Dh31 - diuretic hormone 31, Nos - nitric oxide synthase, CG42260 - cg42260 gene product from transcript cg42260-rb, Eip63F-1 - ecdys…
GO:0051130	positive regulation of cellular component organization	0.000118	0.0145	2.18	11561	297	482	27	[pgc - polar granule component, Syt1 - synaptotagmin 1, numb - cg3779 gene product from transcript cg3779-rb, sdt - stardust, Bap60 - brahma associated protein 60kd, fz - frizzled, Abl - abl tyrosine kinase, tim - timeless, Uvrag - uv-resistance associated gene, shot - short stop, sif - still life, Moe - moesin, PsGEF - protostome-specific gef, trio - cg18214 gene product from transcript cg18214-…
GO:0007412	axon target recognition	0.00012	0.0145	9.23	11561	13	482	5	[Liprin-gamma - cg11206 gene product from transcript cg11206-ra, Lar - leukocyte-antigen-related-like, CadN - cadherin-n, pdm3 - pou domain motif 3, trio - cg18214 gene product from transcript cg18214-ra]
GO:0032535	regulation of cellular component size	0.000131	0.0156	2.77	11561	147	482	17	[desat1 - cg5887 gene product from transcript cg5887-ra, Arpc2 - actin-related protein 2/3 complex, subunit 2, Src64B - src oncogene at 64b, Pvf2 - pdgf- and vegf-related factor 2, sals - sarcomere length short, Abl - abl tyrosine kinase, Pvf3 - pdgf- and vegf-related factor 3, pico - cg11940 gene product from transcript cg11940-rb, CG1227 - cg1227 gene product from transcript cg1227-ra, hts - hu…
GO:0033043	regulation of organelle organization	0.000135	0.0158	1.98	11561	399	482	33	[Syt1 - synaptotagmin 1, pgc - polar granule component, if - inflated, knrl - knirps-like, CG9915 - cg9915 gene product from transcript cg9915-rc, Bap60 - brahma associated protein 60kd, Src64B - src oncogene at 64b, fz - frizzled, Abl - abl tyrosine kinase, mwh - multiple wing hairs, shot - short stop, lilli - lilliputian, Moe - moesin, PsGEF - protostome-specific gef, Rpd3 - cg7471 gene product…
GO:0048609	multicellular organismal reproductive process	0.000147	0.017	1.95	11561	418	482	34	[sfl - sulfateless, kuz - kuzbanian, brat - brain tumor, sqd - squid, retn - retained, SPR - sex peptide receptor, ct - cut, CG10440 - cg10440 gene product from transcript cg10440-rb, desat1 - cg5887 gene product from transcript cg5887-ra, Tbh - tyramine beta hydroxylase, Src64B - src oncogene at 64b, dnc - dunce, ppk23 - pickpocket 23, CG17150 - cg17150 gene product from transcript cg17150-rd, n…
GO:0051049	regulation of transport	0.000158	0.0179	2.22	11561	270	482	25	[brat - brain tumor, Dys - dystrophin, Syt1 - synaptotagmin 1, numb - cg3779 gene product from transcript cg3779-rb, sdt - stardust, CG9915 - cg9915 gene product from transcript cg9915-rc, Frq1 - frequenin 1, Ca-beta - ca2+-channel-protein-beta-subunit, Flo-2 - flotillin-2, Abl - abl tyrosine kinase, eag - ether a go-go, Sytbeta - synaptotagmin beta, tim - timeless, Uvrag - uv-resistance associat…
GO:0035050	embryonic heart tube development	0.000162	0.0181	6.85	11561	21	482	6	[H15 - cg6604 gene product from transcript cg6604-ra, lea - leak, CHES-1-like - checkpoint suppressor homologue, sli - slit, numb - cg3779 gene product from transcript cg3779-rb, tup - tailup]
GO:0048646	anatomical structure formation involved in morphogenesis	0.000171	0.0188	1.98	11561	387	482	32	[sqd - squid, ct - cut, if - inflated, Src64B - src oncogene at 64b, sog - short gastrulation, Abl - abl tyrosine kinase, fra - frazzled, bun - bunched, sli - slit, shot - short stop, cact - cactus, Moe - moesin, porin - cg6647 gene product from transcript cg6647-rb, kirre - kin of irre, rhea - cg6831 gene product from transcript cg6831-rb, Traf4 - tnf-receptor-associated factor 4, CG12517 - cg12…
GO:0040007	growth	0.000183	0.0198	2.53	11561	180	482	19	[bi - bifid, fz - frizzled, dnc - dunce, Abl - abl tyrosine kinase, neuroligin - cg13772 gene product from transcript cg13772-rb, raw - cg12437 gene product from transcript cg12437-rb, sgg - shaggy, Dg - dystroglycan, eag - ether a go-go, Eip63E - ecdysone-induced protein 63e, bun - bunched, Sh - shaker, CadN - cadherin-n, Lar - leukocyte-antigen-related-like, tai - taiman, dpp - decapentaplegic,…
GO:0048589	developmental growth	0.000183	0.0195	2.53	11561	180	482	19	[bi - bifid, fz - frizzled, dnc - dunce, Abl - abl tyrosine kinase, raw - cg12437 gene product from transcript cg12437-rb, neuroligin - cg13772 gene product from transcript cg13772-rb, sgg - shaggy, Dg - dystroglycan, eag - ether a go-go, Eip63E - ecdysone-induced protein 63e, bun - bunched, Sh - shaker, CadN - cadherin-n, Lar - leukocyte-antigen-related-like, tai - taiman, dpp - decapentaplegic,…
GO:0006935	chemotaxis	0.000185	0.0195	5.6	11561	30	482	7	[lea - leak, Sema-1a - cg18405 gene product from transcript cg18405-rd, wun - wunen, sli - slit, Con - connectin, NetB - netrin-b, dpp - decapentaplegic]
GO:0003008	system process	0.000203	0.0212	1.81	11561	531	482	40	[H15 - cg6604 gene product from transcript cg6604-ra, cp309 - cg33957 gene product from transcript cg33957-rm, ct - cut, if - inflated, Tbh - tyramine beta hydroxylase, Src64B - src oncogene at 64b, dnc - dunce, Abl - abl tyrosine kinase, Obp47a - odorant-binding protein 47a, Oatp58Dc - organic anion transporting polypeptide 58dc, 5-HT1A - serotonin receptor 1a, eag - ether a go-go, smi35A - smel…
GO:0030010	establishment of cell polarity	0.00023	0.0237	5.42	11561	31	482	7	[Dys - dystrophin, mwh - multiple wing hairs, sdt - stardust, fz - frizzled, sgg - shaggy, Dg - dystroglycan, sktl - skittles]
GO:0008039	synaptic target recognition	0.00023	0.0234	5.42	11561	31	482	7	[Sema-1a - cg18405 gene product from transcript cg18405-rd, lea - leak, nrm - neuromusculin, tutl - turtle, NetB - netrin-b, slow - slowdown, Pvf3 - pdgf- and vegf-related factor 3]
GO:0007626	locomotory behavior	0.00024	0.024	2.55	11561	169	482	18	[fh - frataxin homolog, Syt1 - synaptotagmin 1, CG10440 - cg10440 gene product from transcript cg10440-rb, shep - alan shepard, tutl - turtle, Tbh - tyramine beta hydroxylase, DAT - dopamine transporter, nab - cg33545 gene product from transcript cg33545-rc, dnc - dunce, shakB - shaking b, neuroligin - cg13772 gene product from transcript cg13772-rb, sgg - shaggy, hiw - highwire, tim - timeless, …
GO:0030030	cell projection organization	0.000257	0.0254	2.05	11561	328	482	28	[sick - sickie, retn - retained, ct - cut, fz - frizzled, Abl - abl tyrosine kinase, qua - quail, ths - thisbe, fra - frazzled, mwh - multiple wing hairs, sli - slit, shot - short stop, tup - tailup, CadN - cadherin-n, comm - commissureless, ftz-f1 - ftz transcription factor 1, mim - missing-in-metastasis, Arpc2 - actin-related protein 2/3 complex, subunit 2, nub - nubbin, Gclc - glutamate-cystei…
GO:0032989	cellular component morphogenesis	0.000262	0.0256	2.15	11561	279	482	25	[sick - sickie, retn - retained, ct - cut, if - inflated, Abl - abl tyrosine kinase, raw - cg12437 gene product from transcript cg12437-rb, ths - thisbe, fra - frazzled, sli - slit, shot - short stop, tup - tailup, CadN2 - cadherin-n2, comm - commissureless, ftz-f1 - ftz transcription factor 1, Arpc2 - actin-related protein 2/3 complex, subunit 2, nub - nubbin, sgg - shaggy, Gclc - glutamate-cyst…
GO:0050877	nervous system process	0.000284	0.0273	1.85	11561	468	482	36	[cp309 - cg33957 gene product from transcript cg33957-rm, ct - cut, if - inflated, Tbh - tyramine beta hydroxylase, Src64B - src oncogene at 64b, dnc - dunce, Abl - abl tyrosine kinase, Obp47a - odorant-binding protein 47a, 5-HT1A - serotonin receptor 1a, eag - ether a go-go, smi35A - smell impaired 35a, hiw - highwire, be - ben, rdgA - retinal degeneration a, Sh - shaker, dpr2 - cg33507 gene pro…
GO:0051493	regulation of cytoskeleton organization	0.000291	0.0277	2.6	11561	157	482	17	[if - inflated, Arpc2 - actin-related protein 2/3 complex, subunit 2, Src64B - src oncogene at 64b, fz - frizzled, sals - sarcomere length short, Abl - abl tyrosine kinase, sgg - shaggy, hts - hu li tai shao, capu - cappuccino, Gbeta13F - g protein beta-subunit 13f, mwh - multiple wing hairs, shot - short stop, lilli - lilliputian, Moe - moesin, ed - echinoid, PsGEF - protostome-specific gef, dia…
GO:0007617	mating behavior	0.000297	0.0278	2.92	11561	115	482	14	[retn - retained, SPR - sex peptide receptor, CG10440 - cg10440 gene product from transcript cg10440-rb, desat1 - cg5887 gene product from transcript cg5887-ra, shep - alan shepard, Tbh - tyramine beta hydroxylase, dnc - dunce, ppk23 - pickpocket 23, neuroligin - cg13772 gene product from transcript cg13772-rb, 5-HT1A - serotonin receptor 1a, eag - ether a go-go, tim - timeless, Sh - shaker, Gr39…
GO:0022414	reproductive process	0.000314	0.0291	1.5	11561	1117	482	70	[sfl - sulfateless, sqd - squid, bab2 - bric a brac 2, pgc - polar granule component, SPR - sex peptide receptor, rib - ribbon, retn - retained, if - inflated, fz - frizzled, dve - defective proventriculus, dnc - dunce, CG17150 - cg17150 gene product from transcript cg17150-rd, sog - short gastrulation, neuroligin - cg13772 gene product from transcript cg13772-rb, raw - cg12437 gene product from …
GO:0051952	regulation of amine transport	0.000318	0.0291	10.66	11561	9	482	4	[Sytbeta - synaptotagmin beta, Syt1 - synaptotagmin 1, PsGEF - protostome-specific gef, CG31935 - cg31935 gene product from transcript cg31935-ra]
GO:0035107	appendage morphogenesis	0.00032	0.029	2.5	11561	173	482	18	[ftz-f1 - ftz transcription factor 1, ct - cut, if - inflated, bi - bifid, mirr - mirror, Gef64C - guanine nucleotide exchange factor gef64c, RhoGAP54D - cg6477 gene product from transcript cg6477-ra, dve - defective proventriculus, CG30456 - cg30456 gene product from transcript cg30456-rb, Gclc - glutamate-cysteine ligase catalytic subunit, dally - division abnormally delayed, m - miniature, mwh…
GO:0098742	cell-cell adhesion via plasma-membrane adhesion molecules	0.000329	0.0294	3.69	11561	65	482	10	[beat-Va - cg10134 gene product from transcript cg10134-rc, if - inflated, beat-Vc - cg14390 gene product from transcript cg14390-ra, tutl - turtle, Con - connectin, CadN - cadherin-n, fz - frizzled, ed - echinoid, kirre - kin of irre, CadN2 - cadherin-n2]
GO:0002009	morphogenesis of an epithelium	0.000331	0.0293	2.25	11561	235	482	22	[Traf4 - tnf-receptor-associated factor 4, bab2 - bric a brac 2, ct - cut, rib - ribbon, bi - bifid, sdt - stardust, fz - frizzled, rap - retina aberrant in pattern, Abl - abl tyrosine kinase, raw - cg12437 gene product from transcript cg12437-rb, Eip63E - ecdysone-induced protein 63e, dally - division abnormally delayed, twi - twist, Gbeta13F - g protein beta-subunit 13f, dib - disembodied, tup …
GO:1902903	regulation of supramolecular fiber organization	0.000341	0.0298	3.2	11561	90	482	12	[hts - hu li tai shao, capu - cappuccino, mwh - multiple wing hairs, if - inflated, Arpc2 - actin-related protein 2/3 complex, subunit 2, shot - short stop, Src64B - src oncogene at 64b, fz - frizzled, sals - sarcomere length short, PsGEF - protostome-specific gef, Abl - abl tyrosine kinase, dia - diaphanous]
GO:0070983	dendrite guidance	0.000361	0.0311	6	11561	24	482	6	[comm - commissureless, fra - frazzled, ct - cut, tup - tailup, NetB - netrin-b, Rpd3 - cg7471 gene product from transcript cg7471-ra]
GO:0010977	negative regulation of neuron projection development	0.000368	0.0314	7.5	11561	16	482	5	[Sema-1a - cg18405 gene product from transcript cg18405-rd, CadN - cadherin-n, Rpd3 - cg7471 gene product from transcript cg7471-ra, Abl - abl tyrosine kinase, sgg - shaggy]
GO:0030100	regulation of endocytosis	0.000373	0.0315	3.63	11561	66	482	10	[comm - commissureless, brat - brain tumor, Uvrag - uv-resistance associated gene, tim - timeless, mim - missing-in-metastasis, numb - cg3779 gene product from transcript cg3779-rb, sdt - stardust, lack - lethal with a checkpoint kinase, mgl - megalin, Moe - moesin]
GO:0050808	synapse organization	0.000381	0.0318	2.63	11561	146	482	16	[comm - commissureless, dpr8 - cg32600 gene product from transcript cg32600-ra, Frq1 - frequenin 1, Ca-beta - ca2+-channel-protein-beta-subunit, CG31646 - cg31646 gene product from transcript cg31646-ra, neuroligin - cg13772 gene product from transcript cg13772-rb, sgg - shaggy, hiw - highwire, Sema-1a - cg18405 gene product from transcript cg18405-rd, dpr6 - cg14162 gene product from transcript …
GO:0016049	cell growth	0.00041	0.0338	3.34	11561	79	482	11	[eag - ether a go-go, Sh - shaker, Lar - leukocyte-antigen-related-like, CadN - cadherin-n, tai - taiman, fz - frizzled, dnc - dunce, trio - cg18214 gene product from transcript cg18214-ra, vg - vestigial, raw - cg12437 gene product from transcript cg12437-rb, CadN2 - cadherin-n2]
GO:0009887	animal organ morphogenesis	0.000455	0.0372	2.04	11561	306	482	26	[kuz - kuzbanian, Egm - enigma, bab2 - bric a brac 2, retn - retained, rib - ribbon, if - inflated, bi - bifid, Src64B - src oncogene at 64b, fz - frizzled, raw - cg12437 gene product from transcript cg12437-rb, Uvrag - uv-resistance associated gene, tup - tailup, kirre - kin of irre, mirr - mirror, rap - retina aberrant in pattern, Pvf2 - pdgf- and vegf-related factor 2, sgg - shaggy, Acer - ang…
GO:0007507	heart development	0.000466	0.0377	3.85	11561	56	482	9	[Acer - angiotensin-converting enzyme-related, H15 - cg6604 gene product from transcript cg6604-ra, twi - twist, G-oalpha47A - g protein oalpha 47a, numb - cg3779 gene product from transcript cg3779-rb, tup - tailup, fz - frizzled, dpp - decapentaplegic, sgg - shaggy]
GO:0030335	positive regulation of cell migration	0.000476	0.0381	4.26	11561	45	482	8	[kuz - kuzbanian, lea - leak, Sema-1a - cg18405 gene product from transcript cg18405-rd, fra - frazzled, sli - slit, Pvf2 - pdgf- and vegf-related factor 2, tai - taiman, Pvf3 - pdgf- and vegf-related factor 3]
GO:0009987	cellular process	0.00048	0.038	1.14	11561	6268	482	297	[sqd - squid, pgc - polar granule component, Cyt-c-p - cytochrome c proximal, knrl - knirps-like, Adh - alcohol dehydrogenase, RhoGAP54D - cg6477 gene product from transcript cg6477-ra, fz - frizzled, CG5048 - cg5048 gene product from transcript cg5048-ra, et - eye transformer, CG14608 - cg14608 gene product from transcript cg14608-rc, CG1227 - cg1227 gene product from transcript cg1227-ra, Sytbe…
GO:0007154	cell communication	0.000495	0.0388	2.06	11561	291	482	25	[Dys - dystrophin, Syt1 - synaptotagmin 1, fusl - fuseless, Frq1 - frequenin 1, Ca-beta - ca2+-channel-protein-beta-subunit, dnc - dunce, shakB - shaking b, Abl - abl tyrosine kinase, neuroligin - cg13772 gene product from transcript cg13772-rb, 5-HT1A - serotonin receptor 1a, be - ben, Liprin-gamma - cg11206 gene product from transcript cg11206-ra, shot - short stop, CadN - cadherin-n, nAcRalpha…
GO:0035114	imaginal disc-derived appendage morphogenesis	0.000522	0.0405	2.47	11561	165	482	17	[ftz-f1 - ftz transcription factor 1, ct - cut, if - inflated, bi - bifid, mirr - mirror, Gef64C - guanine nucleotide exchange factor gef64c, RhoGAP54D - cg6477 gene product from transcript cg6477-ra, dve - defective proventriculus, CG30456 - cg30456 gene product from transcript cg30456-rb, Gclc - glutamate-cysteine ligase catalytic subunit, dally - division abnormally delayed, m - miniature, mwh…
GO:0030832	regulation of actin filament length	0.000533	0.041	3.79	11561	57	482	9	[hts - hu li tai shao, capu - cappuccino, mwh - multiple wing hairs, Arpc2 - actin-related protein 2/3 complex, subunit 2, Src64B - src oncogene at 64b, sals - sarcomere length short, PsGEF - protostome-specific gef, Abl - abl tyrosine kinase, dia - diaphanous]
GO:0008064	regulation of actin polymerization or depolymerization	0.000533	0.0405	3.79	11561	57	482	9	[hts - hu li tai shao, capu - cappuccino, mwh - multiple wing hairs, Arpc2 - actin-related protein 2/3 complex, subunit 2, Src64B - src oncogene at 64b, sals - sarcomere length short, PsGEF - protostome-specific gef, Abl - abl tyrosine kinase, dia - diaphanous]
GO:0048588	developmental cell growth	0.000533	0.0401	3.79	11561	57	482	9	[eag - ether a go-go, Sh - shaker, Lar - leukocyte-antigen-related-like, CadN - cadherin-n, tai - taiman, fz - frizzled, dnc - dunce, trio - cg18214 gene product from transcript cg18214-ra, CadN2 - cadherin-n2]
GO:0051270	regulation of cellular component movement	0.00054	0.0402	2.89	11561	108	482	13	[kuz - kuzbanian, fz - frizzled, Pvf2 - pdgf- and vegf-related factor 2, Evi5 - cg11727 gene product from transcript cg11727-ra, Pvf3 - pdgf- and vegf-related factor 3, fra - frazzled, Sema-1a - cg18405 gene product from transcript cg18405-rd, lea - leak, sli - slit, NetB - netrin-b, Lar - leukocyte-antigen-related-like, CadN - cadherin-n, tai - taiman]
GO:0019219	regulation of nucleobase-containing compound metabolic process	0.000545	0.0402	1.45	11561	1240	482	75	[sqd - squid, bab2 - bric a brac 2, pgc - polar granule component, rib - ribbon, retn - retained, knrl - knirps-like, Vsx2 - visual system homeobox 2 ortholog, dve - defective proventriculus, sog - short gastrulation, mTTF - mitochondrial transcription termination factor, fra - frazzled, Nos - nitric oxide synthase, Hers - histone gene-specific epigenetic repressor in late s phase, bun - bunched,…
GO:0045664	regulation of neuron differentiation	0.000554	0.0405	2.39	11561	181	482	18	[kuz - kuzbanian, comm - commissureless, tutl - turtle, Src64B - src oncogene at 64b, fz - frizzled, Abl - abl tyrosine kinase, sgg - shaggy, Sema-1a - cg18405 gene product from transcript cg18405-rd, fra - frazzled, Trim9 - cg31721 gene product from transcript cg31721-rb, sif - still life, shot - short stop, CadN - cadherin-n, NetB - netrin-b, Lar - leukocyte-antigen-related-like, ed - echinoid,…
GO:0048729	tissue morphogenesis	0.000556	0.0403	2.16	11561	244	482	22	[Traf4 - tnf-receptor-associated factor 4, bab2 - bric a brac 2, ct - cut, rib - ribbon, bi - bifid, sdt - stardust, fz - frizzled, rap - retina aberrant in pattern, Abl - abl tyrosine kinase, raw - cg12437 gene product from transcript cg12437-rb, Eip63E - ecdysone-induced protein 63e, dally - division abnormally delayed, twi - twist, Gbeta13F - g protein beta-subunit 13f, dib - disembodied, tup …
GO:0009890	negative regulation of biosynthetic process	0.000566	0.0406	1.85	11561	414	482	32	[brat - brain tumor, H15 - cg6604 gene product from transcript cg6604-ra, sqd - squid, retn - retained, ct - cut, pgc - polar granule component, bi - bifid, knrl - knirps-like, Vsx2 - visual system homeobox 2 ortholog, nab - cg33545 gene product from transcript cg33545-rc, CG3546 - cg3546 gene product from transcript cg3546-ra, dve - defective proventriculus, drm - drumstick, CG10741 - cg10741 ge…
GO:0031327	negative regulation of cellular biosynthetic process	0.000566	0.0402	1.85	11561	414	482	32	[brat - brain tumor, H15 - cg6604 gene product from transcript cg6604-ra, sqd - squid, retn - retained, ct - cut, pgc - polar granule component, bi - bifid, knrl - knirps-like, Vsx2 - visual system homeobox 2 ortholog, nab - cg33545 gene product from transcript cg33545-rc, CG3546 - cg3546 gene product from transcript cg3546-ra, dve - defective proventriculus, drm - drumstick, CG10741 - cg10741 ge…
GO:0030516	regulation of axon extension	0.000575	0.0404	5.54	11561	26	482	6	[kuz - kuzbanian, Sema-1a - cg18405 gene product from transcript cg18405-rd, shot - short stop, Lar - leukocyte-antigen-related-like, CadN - cadherin-n, fz - frizzled]
GO:0008016	regulation of heart contraction	0.000575	0.0401	5.54	11561	26	482	6	[Acer - angiotensin-converting enzyme-related, eag - ether a go-go, Nos - nitric oxide synthase, tim - timeless, fh - frataxin homolog, for - foraging]
GO:0061387	regulation of extent of cell growth	0.000575	0.0397	5.54	11561	26	482	6	[kuz - kuzbanian, Sema-1a - cg18405 gene product from transcript cg18405-rd, shot - short stop, Lar - leukocyte-antigen-related-like, CadN - cadherin-n, fz - frizzled]
GO:0007186	G protein-coupled receptor signaling pathway	0.000576	0.0394	2.31	11561	197	482	19	[CG34411 - cg34411 gene product from transcript cg34411-rb, CG30340 - cg30340 gene product from transcript cg30340-ra, SPR - sex peptide receptor, Dh31-R1 - diuretic hormone 31 receptor 1, G-oalpha47A - g protein oalpha 47a, Tbh - tyramine beta hydroxylase, mtt - mangetout, fz - frizzled, CG32547 - cg32547 gene product from transcript cg32547-rd, Dh31 - diuretic hormone 31, 5-HT1A - serotonin rec…
GO:0023052	signaling	0.000576	0.0391	2.31	11561	197	482	19	[Syt1 - synaptotagmin 1, Dys - dystrophin, Ca-beta - ca2+-channel-protein-beta-subunit, Frq1 - frequenin 1, fusl - fuseless, nAcRalpha-7E - nicotinic acetylcholine receptor alpha 7e, nAcRalpha-30D - nicotinic acetylcholine receptor alpha 30d, dnc - dunce, Abl - abl tyrosine kinase, neuroligin - cg13772 gene product from transcript cg13772-rb, GluRIIC - glutamate receptor iic, 5-HT1A - serotonin r…
GO:0051050	positive regulation of transport	0.000593	0.0399	2.73	11561	123	482	14	[Hk - hyperkinetic, comm - commissureless, Syt1 - synaptotagmin 1, sdt - stardust, numb - cg3779 gene product from transcript cg3779-rb, Abl - abl tyrosine kinase, Flo-2 - flotillin-2, eag - ether a go-go, Uvrag - uv-resistance associated gene, tim - timeless, CG9850 - cg9850 gene product from transcript cg9850-ra, lack - lethal with a checkpoint kinase, Moe - moesin, CG31935 - cg31935 gene produ…
GO:0060627	regulation of vesicle-mediated transport	0.000593	0.0396	2.73	11561	123	482	14	[brat - brain tumor, comm - commissureless, mim - missing-in-metastasis, Syt1 - synaptotagmin 1, sdt - stardust, numb - cg3779 gene product from transcript cg3779-rb, Sytbeta - synaptotagmin beta, Uvrag - uv-resistance associated gene, tim - timeless, lack - lethal with a checkpoint kinase, mgl - megalin, Moe - moesin, PsGEF - protostome-specific gef, CG31935 - cg31935 gene product from transcrip…
GO:0007409	axonogenesis	0.000609	0.0402	3.72	11561	58	482	9	[Gclc - glutamate-cysteine ligase catalytic subunit, dally - division abnormally delayed, fra - frazzled, sick - sickie, Trim9 - cg31721 gene product from transcript cg31721-rb, shot - short stop, tup - tailup, pdm3 - pou domain motif 3, Abl - abl tyrosine kinase]
GO:0048731	system development	0.000611	0.04	2.11	11561	262	482	23	[kuz - kuzbanian, comm - commissureless, sick - sickie, ct - cut, spz5 - spatzle 5, rib - ribbon, mirr - mirror, numb - cg3779 gene product from transcript cg3779-rb, A2bp1 - ataxin-2 binding protein 1, Src64B - src oncogene at 64b, Abl - abl tyrosine kinase, raw - cg12437 gene product from transcript cg12437-rb, Nos - nitric oxide synthase, wun - wunen, dib - disembodied, cact - cactus, shot - s…
GO:0007427	epithelial cell migration, open tracheal system	0.000611	0.0397	4.66	11561	36	482	7	[sfl - sulfateless, dally - division abnormally delayed, rib - ribbon, knrl - knirps-like, sli - slit, Sdc - syndecan, dpp - decapentaplegic]
GO:0007010	cytoskeleton organization	0.000614	0.0396	1.85	11561	416	482	32	[sqd - squid, cp309 - cg33957 gene product from transcript cg33957-rm, rib - ribbon, if - inflated, Src64B - src oncogene at 64b, feo - fascetto, Bsg25D - blastoderm-specific gene 25d, CG32264 - cg32264 gene product from transcript cg32264-rk, l(1)dd4 - lethal (1) discs degenerate 4, sif - still life, shot - short stop, CG32982 - cg32982 gene product from transcript cg32982-rf, Moe - moesin, trio…
GO:0048858	cell projection morphogenesis	0.000643	0.041	2.43	11561	168	482	17	[comm - commissureless, ftz-f1 - ftz transcription factor 1, sick - sickie, ct - cut, retn - retained, nub - nubbin, Abl - abl tyrosine kinase, Gclc - glutamate-cysteine ligase catalytic subunit, ths - thisbe, Sema-1a - cg18405 gene product from transcript cg18405-rd, fra - frazzled, dally - division abnormally delayed, Trim9 - cg31721 gene product from transcript cg31721-rb, sli - slit, tup - ta…
GO:0048732	gland development	0.000645	0.0409	4.08	11561	47	482	8	[kuz - kuzbanian, retn - retained, rib - ribbon, if - inflated, tup - tailup, Pvf2 - pdgf- and vegf-related factor 2, dpp - decapentaplegic, sog - short gastrulation]
GO:0035295	tube development	0.000674	0.0424	2.35	11561	184	482	18	[H15 - cg6604 gene product from transcript cg6604-ra, CHES-1-like - checkpoint suppressor homologue, if - inflated, numb - cg3779 gene product from transcript cg3779-rb, drm - drumstick, dve - defective proventriculus, Scr - sex combs reduced, sog - short gastrulation, B4 - cg9239 gene product from transcript cg9239-rc, pico - cg11940 gene product from transcript cg11940-rb, lea - leak, dally - d…
GO:0001764	neuron migration	0.000676	0.0421	14.39	11561	5	482	3	[lea - leak, sli - slit, Abl - abl tyrosine kinase]
GO:0030534	adult behavior	0.000689	0.0426	2.49	11561	154	482	16	[fh - frataxin homolog, CG10440 - cg10440 gene product from transcript cg10440-rb, Adh - alcohol dehydrogenase, shep - alan shepard, tutl - turtle, Tbh - tyramine beta hydroxylase, DAT - dopamine transporter, mtt - mangetout, dnc - dunce, shakB - shaking b, neuroligin - cg13772 gene product from transcript cg13772-rb, eag - ether a go-go, hiw - highwire, Sh - shaker, GRHRII - cg10698 gene product…
GO:0051961	negative regulation of nervous system development	0.000703	0.0431	2.81	11561	111	482	13	[brat - brain tumor, G-oalpha47A - g protein oalpha 47a, numb - cg3779 gene product from transcript cg3779-rb, Bap60 - brahma associated protein 60kd, Src64B - src oncogene at 64b, Abl - abl tyrosine kinase, sgg - shaggy, hiw - highwire, Sema-1a - cg18405 gene product from transcript cg18405-rd, Liprin-gamma - cg11206 gene product from transcript cg11206-ra, CadN - cadherin-n, Rpd3 - cg7471 gene …
GO:1903522	regulation of blood circulation	0.000713	0.0434	5.33	11561	27	482	6	[Acer - angiotensin-converting enzyme-related, eag - ether a go-go, Nos - nitric oxide synthase, tim - timeless, fh - frataxin homolog, for - foraging]
GO:0060560	developmental growth involved in morphogenesis	0.000773	0.0466	3.1	11561	85	482	11	[Sh - shaker, Lar - leukocyte-antigen-related-like, CadN - cadherin-n, tai - taiman, fz - frizzled, dnc - dunce, Abl - abl tyrosine kinase, trio - cg18214 gene product from transcript cg18214-ra, vg - vestigial, raw - cg12437 gene product from transcript cg12437-rb, CadN2 - cadherin-n2]
GO:0019935	cyclic-nucleotide-mediated signaling	0.000785	0.047	3.6	11561	60	482	9	[CG34411 - cg34411 gene product from transcript cg34411-rb, CG42260 - cg42260 gene product from transcript cg42260-rb, Cng - cyclic-nucleotide-gated ion channel protein, Gyc88E - guanylyl cyclase at 88e, Pdfr - pigment-dispersing factor receptor, Pde9 - phosphodiesterase 9, dnc - dunce, Ac13E - adenylyl cyclase 35c, Dh31 - diuretic hormone 31]
GO:0050767	regulation of neurogenesis	0.000792	0.0471	2.07	11561	267	482	23	[kuz - kuzbanian, brat - brain tumor, comm - commissureless, numb - cg3779 gene product from transcript cg3779-rb, tutl - turtle, Bap60 - brahma associated protein 60kd, Src64B - src oncogene at 64b, nub - nubbin, fz - frizzled, Abl - abl tyrosine kinase, sgg - shaggy, fra - frazzled, Sema-1a - cg18405 gene product from transcript cg18405-rd, Trim9 - cg31721 gene product from transcript cg31721-r…
GO:0035120	post-embryonic appendage morphogenesis	0.000794	0.0468	2.46	11561	156	482	16	[ftz-f1 - ftz transcription factor 1, if - inflated, bi - bifid, mirr - mirror, Gef64C - guanine nucleotide exchange factor gef64c, RhoGAP54D - cg6477 gene product from transcript cg6477-ra, dve - defective proventriculus, CG30456 - cg30456 gene product from transcript cg30456-rb, Gclc - glutamate-cysteine ligase catalytic subunit, dally - division abnormally delayed, m - miniature, mwh - multipl…
GO:0051960	regulation of nervous system development	0.000796	0.0465	1.91	11561	352	482	28	[kuz - kuzbanian, brat - brain tumor, numb - cg3779 gene product from transcript cg3779-rb, Bap60 - brahma associated protein 60kd, Src64B - src oncogene at 64b, fz - frizzled, Abl - abl tyrosine kinase, hiw - highwire, fra - frazzled, bun - bunched, Liprin-gamma - cg11206 gene product from transcript cg11206-ra, shot - short stop, sif - still life, CadN - cadherin-n, trio - cg18214 gene product …
GO:0019098	reproductive behavior	0.000819	0.0475	2.64	11561	127	482	14	[retn - retained, SPR - sex peptide receptor, CG10440 - cg10440 gene product from transcript cg10440-rb, desat1 - cg5887 gene product from transcript cg5887-ra, shep - alan shepard, Tbh - tyramine beta hydroxylase, dnc - dunce, ppk23 - pickpocket 23, neuroligin - cg13772 gene product from transcript cg13772-rb, eag - ether a go-go, 5-HT1A - serotonin receptor 1a, tim - timeless, Sh - shaker, Gr39…
GO:2000147	positive regulation of cell motility	0.00086	0.0495	3.92	11561	49	482	8	[kuz - kuzbanian, lea - leak, Sema-1a - cg18405 gene product from transcript cg18405-rd, fra - frazzled, sli - slit, tai - taiman, Pvf2 - pdgf- and vegf-related factor 2, Pvf3 - pdgf- and vegf-related factor 3]
GO:0097435	supramolecular fiber organization	0.000977	0.0558	2.5	11561	144	482	15	[sick - sickie, if - inflated, Arpc2 - actin-related protein 2/3 complex, subunit 2, Src64B - src oncogene at 64b, qua - quail, Zasp66 - z band alternatively spliced pdz-motif protein 66, pico - cg11940 gene product from transcript cg11940-rb, hts - hu li tai shao, capu - cappuccino, m - miniature, l(1)dd4 - lethal (1) discs degenerate 4, shot - short stop, Moe - moesin, ed - echinoid, dia - diap…
GO:0090287	regulation of cellular response to growth factor stimulus	0.000988	0.056	3.84	11561	50	482	8	[hiw - highwire, dally - division abnormally delayed, fra - frazzled, nst - nesthocker, kek5 - kekkon5, lack - lethal with a checkpoint kinase, Src64B - src oncogene at 64b, sog - short gastrulation]
GO:0045595	regulation of cell differentiation	0.000991	0.0558	1.79	11561	428	482	32	[kuz - kuzbanian, H15 - cg6604 gene product from transcript cg6604-ra, brat - brain tumor, bab2 - bric a brac 2, Syt1 - synaptotagmin 1, numb - cg3779 gene product from transcript cg3779-rb, Bap60 - brahma associated protein 60kd, Src64B - src oncogene at 64b, fz - frizzled, Abl - abl tyrosine kinase, fra - frazzled, bun - bunched, sif - still life, shot - short stop, cact - cactus, CadN - cadher…
Component
GO Term	Description	P-value	FDR q-value	Enrichment	N	B	n	b	Gene
GO:0044459	plasma membrane part	3.02e-10	3.99e-07	2.19	11561	768	482	70	[Dys - dystrophin, if - inflated, sdt - stardust, mtt - mangetout, fz - frizzled, CG1688 - cg1688 gene product from transcript cg1688-ra, VhaSFD - vacuolar h[+]-atpase sfd subunit, neuroligin - cg13772 gene product from transcript cg13772-rb, Oatp58Dc - organic anion transporting polypeptide 58dc, fra - frazzled, AP-50 - cg7057 gene product from transcript cg7057-rb, Sh - shaker, Moe - moesin, nA…
GO:0005886	plasma membrane	5.56e-09	3.67e-06	2.13	11561	721	482	64	[Syt1 - synaptotagmin 1, SPR - sex peptide receptor, if - inflated, CG42389 - cg42389 gene product from transcript cg42389-re, SK - small conductance calcium-activated potassium channel, fz - frizzled, raw - cg12437 gene product from transcript cg12437-rb, CG1698 - cg1698 gene product from transcript cg1698-ra, Sytbeta - synaptotagmin beta, Eip63E - ecdysone-induced protein 63e, Nos - nitric oxid…
GO:0031226	intrinsic component of plasma membrane	1.29e-07	5.65e-05	2.42	11561	406	482	41	[CG34411 - cg34411 gene product from transcript cg34411-rb, Dh31-R1 - diuretic hormone 31 receptor 1, if - inflated, mtt - mangetout, fz - frizzled, CG1688 - cg1688 gene product from transcript cg1688-ra, neuroligin - cg13772 gene product from transcript cg13772-rb, Oatp58Dc - organic anion transporting polypeptide 58dc, 5-HT1A - serotonin receptor 1a, eag - ether a go-go, CG8249 - cg8249 gene pr…
GO:0016020	membrane	2.68e-07	8.82e-05	1.65	11561	1428	482	98	[Cyt-c-p - cytochrome c proximal, if - inflated, sdt - stardust, CG42389 - cg42389 gene product from transcript cg42389-re, fz - frizzled, et - eye transformer, neuroligin - cg13772 gene product from transcript cg13772-rb, raw - cg12437 gene product from transcript cg12437-rb, CG1698 - cg1698 gene product from transcript cg1698-ra, Sytbeta - synaptotagmin beta, fra - frazzled, CG32091 - cg32091 g…
GO:0005887	integral component of plasma membrane	4.15e-07	0.00011	2.38	11561	393	482	39	[CG34411 - cg34411 gene product from transcript cg34411-rb, Dh31-R1 - diuretic hormone 31 receptor 1, if - inflated, mtt - mangetout, fz - frizzled, CG1688 - cg1688 gene product from transcript cg1688-ra, neuroligin - cg13772 gene product from transcript cg13772-rb, Oatp58Dc - organic anion transporting polypeptide 58dc, 5-HT1A - serotonin receptor 1a, eag - ether a go-go, CG8249 - cg8249 gene pr…
GO:0098797	plasma membrane protein complex	3.65e-06	0.000802	3.11	11561	162	482	21	[Hk - hyperkinetic, Dys - dystrophin, if - inflated, G-oalpha47A - g protein oalpha 47a, sdt - stardust, Dyb - dystrobrevin-like, Ca-beta - ca2+-channel-protein-beta-subunit, nAcRalpha-7E - nicotinic acetylcholine receptor alpha 7e, nAcRalpha-30D - nicotinic acetylcholine receptor alpha 30d, Flo-2 - flotillin-2, VhaSFD - vacuolar h[+]-atpase sfd subunit, GluRIIC - glutamate receptor iic, Dg - dys…
GO:0005938	cell cortex	7.11e-05	0.0134	2.91	11561	140	482	17	[Traf4 - tnf-receptor-associated factor 4, brat - brain tumor, igl - igloo, Dys - dystrophin, sdt - stardust, Arpc2 - actin-related protein 2/3 complex, subunit 2, Gef64C - guanine nucleotide exchange factor gef64c, numb - cg3779 gene product from transcript cg3779-rb, Abl - abl tyrosine kinase, capu - cappuccino, Moe - moesin, sano - serrano, ed - echinoid, dia - diaphanous, sha - shavenoid, ins…
GO:0099568	cytoplasmic region	0.000101	0.0167	2.83	11561	144	482	17	[Traf4 - tnf-receptor-associated factor 4, brat - brain tumor, igl - igloo, Dys - dystrophin, sdt - stardust, Arpc2 - actin-related protein 2/3 complex, subunit 2, Gef64C - guanine nucleotide exchange factor gef64c, numb - cg3779 gene product from transcript cg3779-rb, Abl - abl tyrosine kinase, capu - cappuccino, Moe - moesin, sano - serrano, ed - echinoid, dia - diaphanous, sha - shavenoid, ins…
GO:0034702	ion channel complex	0.000157	0.023	3.72	11561	71	482	11	[eag - ether a go-go, Hk - hyperkinetic, CG42260 - cg42260 gene product from transcript cg42260-rb, Cng - cyclic-nucleotide-gated ion channel protein, Ca-beta - ca2+-channel-protein-beta-subunit, Sh - shaker, nAcRalpha-7E - nicotinic acetylcholine receptor alpha 7e, nAcRalpha-30D - nicotinic acetylcholine receptor alpha 30d, nAcRalpha-34E - nicotinic acetylcholine receptor alpha 34e, GluRIIC - gl…
GO:0044295	axonal growth cone	0.000181	0.0238	8.57	11561	14	482	5	[fra - frazzled, Trim9 - cg31721 gene product from transcript cg31721-rb, Con - connectin, shot - short stop, NetB - netrin-b]
GO:0098590	plasma membrane region	0.000287	0.0344	2.1	11561	297	482	26	[if - inflated, sdt - stardust, fusl - fuseless, neuroligin - cg13772 gene product from transcript cg13772-rb, Oatp58Dc - organic anion transporting polypeptide 58dc, dpr2 - cg33507 gene product from transcript cg33507-re, mgl - megalin, Moe - moesin, nAcRalpha-34E - nicotinic acetylcholine receptor alpha 34e, dpr8 - cg32600 gene product from transcript cg32600-ra, nAcRalpha-7E - nicotinic acetyl…
GO:0009986	cell surface	0.000329	0.0361	3.69	11561	65	482	10	[Toll-4 - cg18241 gene product from transcript cg18241-ra, dally - division abnormally delayed, CG34127 - cg34127 gene product from transcript cg34127-rc, Con - connectin, slow - slowdown, Sdc - syndecan, ed - echinoid, neuroligin - cg13772 gene product from transcript cg13772-rb, kirre - kin of irre, CadN2 - cadherin-n2]
GO:0030054	cell junction	0.000352	0.0357	2.65	11561	145	482	16	[Tsf2 - transferrin 2, if - inflated, sdt - stardust, slow - slowdown, Abl - abl tyrosine kinase, shakB - shaking b, wun - wunen, shot - short stop, Lar - leukocyte-antigen-related-like, CadN - cadherin-n, Moe - moesin, ed - echinoid, dia - diaphanous, kirre - kin of irre, CadN2 - cadherin-n2, rhea - cg6831 gene product from transcript cg6831-rb]
GO:0098595	perivitelline space	0.000368	0.0346	7.5	11561	16	482	5	[kuz - kuzbanian, CG32066 - cg32066 gene product from transcript cg32066-rb, dally - division abnormally delayed, fra - frazzled, Sdc - syndecan]
GO:0097458	neuron part	0.000377	0.0331	1.77	11561	529	482	39	[brat - brain tumor, Syt1 - synaptotagmin 1, fusl - fuseless, Bap60 - brahma associated protein 60kd, SK - small conductance calcium-activated potassium channel, mtt - mangetout, Abl - abl tyrosine kinase, 5-HT1A - serotonin receptor 1a, Sytbeta - synaptotagmin beta, fra - frazzled, dpr2 - cg33507 gene product from transcript cg33507-re, shot - short stop, CadN - cadherin-n, Pdfr - pigment-disper…
GO:0030426	growth cone	0.000458	0.0378	5.76	11561	25	482	6	[fra - frazzled, Trim9 - cg31721 gene product from transcript cg31721-rb, Con - connectin, shot - short stop, NetB - netrin-b, trio - cg18214 gene product from transcript cg18214-ra]
GO:0070161	anchoring junction	0.000464	0.036	3.09	11561	93	482	12	[if - inflated, sdt - stardust, shot - short stop, Lar - leukocyte-antigen-related-like, slow - slowdown, Moe - moesin, ed - echinoid, Abl - abl tyrosine kinase, dia - diaphanous, kirre - kin of irre, CadN2 - cadherin-n2, rhea - cg6831 gene product from transcript cg6831-rb]
GO:0005912	adherens junction	0.000464	0.034	3.09	11561	93	482	12	[if - inflated, sdt - stardust, shot - short stop, Lar - leukocyte-antigen-related-like, slow - slowdown, Moe - moesin, ed - echinoid, Abl - abl tyrosine kinase, dia - diaphanous, kirre - kin of irre, rhea - cg6831 gene product from transcript cg6831-rb, CadN2 - cadherin-n2]
GO:0044449	contractile fiber part	0.000538	0.0374	3.48	11561	69	482	10	[Lmpt - limpet, CG14964 - cg14964 gene product from transcript cg14964-rb, zormin - cg33484 gene product from transcript cg33484-rk, sls - sallimus, CG43707 - cg43707 gene product from transcript cg43707-rd, sals - sarcomere length short, CG17839 - cg17839 gene product from transcript cg17839-rb, Dg - dystroglycan, Zasp66 - z band alternatively spliced pdz-motif protein 66, rhea - cg6831 gene pro…
GO:0030427	site of polarized growth	0.000713	0.047	5.33	11561	27	482	6	[fra - frazzled, Trim9 - cg31721 gene product from transcript cg31721-rb, Con - connectin, shot - short stop, NetB - netrin-b, trio - cg18214 gene product from transcript cg18214-ra]
GO:0008076	voltage-gated potassium channel complex	0.000779	0.0489	8.72	11561	11	482	4	[eag - ether a go-go, Hk - hyperkinetic, Sh - shaker, CG5888 - cg5888 gene product from transcript cg5888-ra]
Function
GO Term	Description	P-value	FDR q-value	Enrichment	N	B	n	b	Gene
GO:0005515	protein binding	1.6e-06	0.00449	1.45	11561	2215	482	134	[Adh - alcohol dehydrogenase, knrl - knirps-like, if - inflated, sdt - stardust, fz - frizzled, feo - fascetto, et - eye transformer, CG5001 - cg5001 gene product from transcript cg5001-rb, CG5048 - cg5048 gene product from transcript cg5048-ra, neuroligin - cg13772 gene product from transcript cg13772-rb, pico - cg11940 gene product from transcript cg11940-rb, Sytbeta - synaptotagmin beta, fra -…
GO:0005261	cation channel activity	1.65e-05	0.0231	3.13	11561	138	482	18	[Hk - hyperkinetic, Cng - cyclic-nucleotide-gated ion channel protein, Ca-beta - ca2+-channel-protein-beta-subunit, nAcRalpha-7E - nicotinic acetylcholine receptor alpha 7e, CG15270 - cg15270 gene product from transcript cg15270-rc, SK - small conductance calcium-activated potassium channel, ppk23 - pickpocket 23, nAcRalpha-30D - nicotinic acetylcholine receptor alpha 30d, CG1688 - cg1688 gene pr…
GO:0042803	protein homodimerization activity	1.65e-05	0.0154	3.13	11561	138	482	18	[mim - missing-in-metastasis, Syt1 - synaptotagmin 1, Adh - alcohol dehydrogenase, mirr - mirror, Gyc88E - guanylyl cyclase at 88e, et - eye transformer, Scr - sex combs reduced, bru-3 - bruno-3, wbl - windbeutel, lea - leak, wun - wunen, bun - bunched, twi - twist, Liprin-gamma - cg11206 gene product from transcript cg11206-ra, CadN - cadherin-n, dpp - decapentaplegic, mod(mdg4) - modifier of md…
GO:0005488	binding	5.46e-05	0.0382	1.2	11561	5110	482	255	[sqd - squid, Cyt-c-p - cytochrome c proximal, knrl - knirps-like, Adh - alcohol dehydrogenase, fz - frizzled, CG5048 - cg5048 gene product from transcript cg5048-ra, et - eye transformer, CG14608 - cg14608 gene product from transcript cg14608-rc, CG1227 - cg1227 gene product from transcript cg1227-ra, Sytbeta - synaptotagmin beta, pico - cg11940 gene product from transcript cg11940-rb, CG10053 -…
GO:0042802	identical protein binding	6.68e-05	0.0374	2.82	11561	153	482	18	[mim - missing-in-metastasis, Syt1 - synaptotagmin 1, Adh - alcohol dehydrogenase, mirr - mirror, Gyc88E - guanylyl cyclase at 88e, et - eye transformer, Scr - sex combs reduced, bru-3 - bruno-3, wbl - windbeutel, lea - leak, wun - wunen, bun - bunched, twi - twist, Liprin-gamma - cg11206 gene product from transcript cg11206-ra, CadN - cadherin-n, dpp - decapentaplegic, mod(mdg4) - modifier of md…
